# Supplementary material
Source: ML conference proceedings conference paper supplement (https://openaccess.thecvf.com/content/ACCV2020/html/Lumentut_Human_Motion_Deblurring_ACCV_2020_paper.html)
Supplement: Supplementary file 2 [file Lumentut_Human_Motion_Deblurring_ACCV_2020_supplemental.zip]

Archive with 2 entries (2 files):
- 0228-supp.mp4
- 0228-supp.pdf
